# Supplementary material for: Machine learning approach to classifying declines of physical function and muscle strength associated with cognitive function in older women: gait characteristics based on three speeds
Source: Front Public Health. 2024 Jun 12;12:1376736. doi: 10.3389/fpubh.2024.1376736 (PMC11232496; doi:10.3389/fpubh.2024.1376736)
Supplement: Supplementary file 2 [file Data_Sheet_2.xlsx]

## Sheet: raw data
Number	age	MS_group	MF_group	MS_kg	education	Cog_score	five_sittostand	Height_m	Bodymass_kg	BMI	Musclemass_kg	Fatmass_kg	Percent_body_fat_%	IPAQ	S_GS	P_GS	F_GS	S_RealSteps	P_RealSteps	F_RealSteps	S_LeftStrideLength	P_LeftStrideLength	F_LeftStrideLength	S_RightStrideLength	P_RightStrideLength	F_RightStrideLength	S_LeftStepLength	P_LeftStepLength	F_LeftStepLength	S_RightStepLength	P_RightStepLength	F_RightStepLength	S_LeftSingleSupportPhase	P_LeftSingleSupportPhase	F_LeftSingleSupportPhase	S_RightSingleSupportPhase	P_RightSingleSupportPhase	F_RightSingleSupportPhase	S_LeftDoubleSupportPhase	P_LeftDoubleSupportPhase	F_LeftDoubleSupportPhase	S_RightDoubleSupportPhase	P_RightDoubleSupportPhase	F_RightDoubleSupportPhase	S_LeftStancePhase	P_LeftStancePhase	F_LeftStancePhase	S_RightStancePhase	P_RightStancePhase
1	68	1	1	33.7	18	29	8.11	1.6	57.6	22.5	25	13	22.2	4986	1.05556	1.38889	1.61111	22	21	19	1.3359	1.3837	1.5191	1.3324	1.3819	1.5168	0.6679	0.6918	0.7595	0.6662	0.691	0.7584	41.0887	43.6637	45.4545	41.2852	43.9698	45.3718	17.7349	12.4216	9.2424	17.4715	12.2961	9.0909	58.8235	56.0853	54.697	58.6479	56.2108
2	69	1	1	23.7	18	30	9.7	1.54	60.6	25.6	21	22	36.3	6426	1.05556	1.22222	1.47222	24	23	20	1.2065	1.2738	1.4244	1.2012	1.263	1.4225	0.6033	0.6369	0.7122	0.6006	0.6315	0.7113	38.8451	40.2985	42.3773	39.7188	41.5054	43.3376	21.6098	18.5501	14.3411	21.1724	17.6972	14.2119	60.4549	58.8486	56.7183	60.7174	58.8486
3	70	1	1	24	18	30	9.4	1.5	55.2	24.5	20	19	34.1	3906	1.30556	1.52778	1.77778	22	20	19	1.2983	1.3865	1.4298	1.2954	1.3865	1.4298	0.6492	0.6932	0.7149	0.6477	0.6932	0.7149	42.2346	44.2149	44.2274	41.4334	43.5262	44.0497	16.4246	12.259	11.7229	16.2011	12.259	11.7229	58.6592	56.4738	55.9503	57.5419	55.7851
4	72	1	2	20.4	9	27	13.5	1.56	61.1	25.1	21	21	34.8	6426	0.833333	1.02778	1.11111	29	25	23	1.0049	1.1419	1.0444	1.0035	1.1408	1.0432	0.5024	0.5709	0.5222	0.5017	0.5704	0.5216	40.152	40.8641	43.026	40.9689	41.8018	44.0237	18.9357	17.3717	13.0024	18.7975	17.2817	12.8842	59.0878	58.2358	56.0284	59.7097	59.0459
5	71	1	2	24	9	26	13.03	1.49	61.9	27.9	20	25	40.2	2895	0.944444	1.02778	1.27778	28	27	24	1.0271	1.0521	1.1858	1.0271	1.0427	1.1807	0.5135	0.526	0.5929	0.5135	0.5214	0.5903	41.5326	41.119	42.9957	41.2261	41.9355	43.0736	17.2414	17.3179	14.1164	17.2414	16.4298	13.6853	58.7739	58.4369	57.1121	58.4674	57.9929
6	69	3	3	22.1	12	22	7.1	1.53	52	22.2	20	14	26.8	5676	1.11111	1.22222	1.77778	24	23	21	1.2111	1.1733	1.2956	1.2122	1.1747	1.2956	0.6056	0.5867	0.6478	0.6061	0.5873	0.6478	41.5596	43.287	47.5129	41.5215	43.1214	46.4837	16.8807	13.5417	6.0034	16.9725	13.6574	6.0034	58.4404	56.8287	53.5163	58.5321	56.8287
7	71	1	1	25.8	9	30	9.23	1.53	66.6	28.5	23	24	36.5	99	1.13889	1.33333	1.58333	25	22	20	1.1856	1.2889	1.4032	1.1867	1.2919	1.3973	0.5928	0.6444	0.7016	0.5934	0.6459	0.6986	42.3631	44.1379	45.134	41.8426	43.1193	44.7592	15.7541	12.6437	10.2962	15.8501	12.8736	9.8731	58.1172	56.7816	55.4302	57.7329	56.092
8	78	4	4	12.8	9	23	13.56	1.48	76.9	35.1	20	39	50.2	1533	0.75	0.833333	1	31	32	28	0.9363	0.8929	1.0317	0.9375	0.8893	1.035	0.4682	0.4464	0.5158	0.4688	0.4446	0.5175	37.5847	38.8667	39.9031	39.0769	38.822	40.3382	23.2902	22.4667	19.6284	23.4134	22.0667	19.9515	60.8749	61.3333	59.5315	62.5385	60.7333
9	70	3	3	22.2	9	22	11.45	1.45	57.6	27.4	18	24	41.2	9198	1	1.02778	1.22222	23	28	25	0.9056	1.0355	1.1538	0.9033	1.0415	1.1513	0.4528	0.5177	0.5769	0.4517	0.5207	0.5757	43.4356	41.5219	43.1144	42.8044	40.1316	41.8259	13.865	18.1141	15.1483	13.6196	18.6931	14.9364	57.3006	59.6361	58.2627	56.319	59.0571
10	85	2	1	16.1	9	26	10.06	1.36	42.7	23.1	15	14	32.6	1314	0.722222	0.916667	0.944444	33	28	28	0.8677	1.0076	1.0027	0.8656	1.0007	1.0035	0.4338	0.5038	0.5013	0.4328	0.5003	0.5017	39.1795	39.5754	41.5228	40.2861	41.7557	41.4118	20.6302	18.9538	17.033	20.3924	18.2714	17.1115	59.8098	58.5292	58.5557	60.5826	59.7422
11	76	2	1	11.6	6	27	11.47	1.44	59.1	28.5	19	23	39.4	1053	1.13889	1.16667	1.55556	25	25	21	1.1651	1.1048	1.3203	1.1639	1.1083	1.3222	0.5825	0.5524	0.6601	0.582	0.5542	0.6611	41.9355	41.9219	45.2135	41.4873	41.8947	44.2647	16.6178	16.0507	10.4566	16.52	16.3675	10.6038	58.5533	57.9725	55.6701	57.9668	58.3949
12	72	1	2	18.5	9	27	22.03	1.56	66.2	27.2	21	27	40.7	495	0.861111	1.13889	1.41667	24	22	20	1.2021	1.2515	1.4096	1.2064	1.2667	1.4025	0.6011	0.6258	0.7048	0.6032	0.6333	0.7013	40.043	40.546	43.2161	39.3291	42.0579	42.5505	20.4871	16.8857	14.4472	20.8453	18.0991	13.9447	60.5301	57.4317	57.6633	60.3152	60.6673
13	74	3	4	21.7	9	23	15.413	1.57	76.8	31.2	25	31	39.7	1155	0.694444	0.833333	1.13889	30	32	24	0.9434	0.9125	1.2368	0.9428	0.9101	1.2334	0.4717	0.4563	0.6184	0.4714	0.4551	0.6167	38.7316	40.1826	41.3444	38.6969	40.4186	40.8126	22.5934	19.5042	17.9558	22.5368	19.2433	17.6796	61.325	59.6869	59.3002	61.2118	59.5564
14	73	1	2	25.9	9	29	19.64	1.55	65.2	27.1	21	27	40.9	693	0.75	0.944444	1.19444	28	27	23	0.9994	1.0629	1.2303	0.9944	1.0595	1.229	0.4997	0.5315	0.6151	0.4972	0.5297	0.6145	40.2126	42.4879	43.6893	38.3407	40.1945	42.1166	21.6385	17.4475	14.2395	21.1382	17.1244	14.1316	61.8512	59.9354	57.9288	59.2871	57.189
15	73	1	2	19.2	9	27	19	1.55	65.3	27.2	21	26	39.9	0	0.666667	0.777778	0.972222	31	30	28	0.9492	0.9184	1.0176	0.9482	0.9327	1.0233	0.4746	0.4592	0.5088	0.4741	0.4664	0.5116	38.5737	38.9577	40.3662	37.2093	38.6145	40.2217	24.2572	21.8241	19.1879	24.1491	23.3876	19.7452	62.8309	60.7818	59.5541	61.3182	62.6059
16	80	3	3	23.3	9	16	9.95	1.5	49.9	22.2	18	16	31.4	2772	0.888889	0.972222	1.05556	28	26	26	1.0319	1.1075	1.0623	1.0311	1.1083	1.0594	0.5159	0.5537	0.5311	0.5156	0.5542	0.5297	41.3496	41.0215	43.4508	39.6552	40.4306	42.8442	19.0237	18.5156	13.8211	18.9519	18.5954	13.5501	60.3733	59.5371	57.2719	58.5786	59.0583
17	81	3	3	22.4	9	20	11.04	1.5	48.7	21.6	18	15	30	924	1.08333	1.30556	1.55556	23	21	20	1.2194	1.2354	1.3942	1.2254	1.2223	1.3903	0.6097	0.6177	0.6971	0.6127	0.6112	0.6951	41.6584	43.3289	45.1883	39.391	42.3231	43.6364	18.7562	14.7952	11.2971	19.2498	13.7384	11.0181	60.4146	58.1242	56.4854	58.8351	55.6143
18	75	3	4	24.5	9	18	12.119	1.55	65.8	27.4	23	23	35.5	297	0.833333	0.972222	1.13889	30	28	24	0.9628	1.0622	1.2084	0.9647	1.063	1.2118	0.4814	0.5311	0.6042	0.4824	0.5315	0.6059	38.4154	39.7407	40.4336	40.3987	42.0732	42.3872	21.1052	18.1541	17.0594	21.3049	18.2304	17.3421	59.5206	57.8947	57.4929	61.7843	60.3356
19	78	1	2	27.6	9	24	16.8	1.5	58.8	26.1	18	24	41.1	693	0.722222	0.916667	0.972222	31	33	31	0.9694	0.8833	0.9206	0.9689	0.8774	0.9221	0.4847	0.4416	0.4603	0.4844	0.4387	0.4611	38.9685	40.0297	40.7799	42.2018	43.806	43.2279	18.8539	16.4566	15.922	18.7966	15.7895	16.0845	57.8223	56.4863	56.7019	60.9742	59.3032
20	73	3	3	22.6	9	16	9.34	1.49	56	25.2	18	22	38.6	924	0.888889	1.05556	1.36111	29	26	22	0.9622	1.1055	1.2568	0.9637	1.1122	1.2522	0.4811	0.5527	0.6284	0.4819	0.5561	0.6261	39.9538	40.7118	42.4789	39.8924	40.9836	43.2367	20.0924	18.0556	14.4404	20.2463	18.6632	14.0794	60.0462	58.7674	56.9194	60.2002	59.8958
21	80	4	4	14.2	9	16	12.33	1.4	56.6	28.9	18	22	38.7	462	0.611111	0.75	0.944444	40	39	32	0.7208	0.7553	0.8979	0.7174	0.7531	0.8986	0.3604	0.3776	0.4489	0.3587	0.3765	0.4493	37.918	38.9019	40.2705	39.0913	39.8946	40.991	23.1748	21.3201	18.7077	22.7037	21.028	18.7829	61.0928	60.222	58.9782	61.6109	60.8061
22	78	4	3	17.3	9	17	10.63	1.41	41.7	21	14	14	33.2	3066	0.833333	1.13889	1.36111	29	26	23	0.9833	1.1089	1.287	0.9785	1.1109	1.2855	0.4917	0.5544	0.6435	0.4892	0.5555	0.6427	40.678	41.7367	42.1857	39.2477	40.6337	41.2941	20.2684	17.5537	16.5687	19.774	17.7404	16.4512	60.9463	59.2904	58.7544	58.8277	58.45
23	78	1	2	21.4	9	24	12	1.41	40.5	20.4	14	13	31.9	594	0.944444	1.16667	1.36111	26	26	23	1.1033	1.1433	1.2356	1.1033	1.1391	1.2356	0.5516	0.5717	0.6178	0.5516	0.5695	0.6178	40.9339	42.115	43.6965	38.4436	41.7132	43.3293	20.6226	16.3265	12.9743	20.6226	15.9555	12.9743	61.5564	58.4416	56.6707	59.0661	57.5139
24	74	1	2	22.1	9	28	18.11	1.55	52.9	22	19	17	32.8	693	0.944444	1.05556	1.36111	28	26	22	1.0664	1.1342	1.2961	1.0641	1.1342	1.2976	0.5332	0.5671	0.648	0.532	0.5671	0.6488	38.893	39.6785	41.7736	38.5355	39.0017	41.8415	22.6568	21.3198	16.3361	22.4354	21.3198	16.4527	61.5498	60.9983	58.1097	60.8856	60.3215
25	79	4	3	7.9	9	15	11.17	1.48	54.2	24.7	17	21	39.2	1386	0.777778	1.02778	1.11111	34	25	27	0.8493	0.9723	0.9929	0.853	0.9702	0.9879	0.4247	0.4861	0.4965	0.4265	0.4851	0.4939	38.1563	41.4376	42.0142	38.3587	43.2203	42.7403	23.3211	15.4334	15.4629	23.7485	15.222	14.9542	61.4774	56.871	57.4771	62.2711	58.351
26	74	1	2	20.1	12	24	12.47	1.49	50.8	22.9	16	20	39.8	693	0.722222	0.888889	1.11111	34	31	29	0.8609	0.9183	0.9981	0.858	0.908	1.0074	0.4304	0.4591	0.4991	0.429	0.454	0.5037	37.5839	39.3894	41.6512	40.404	42.3193	43.3824	22.1477	18.764	14.564	21.8121	17.6471	15.4917	59.7315	58.1534	56.2152	62.0805	59.4937
27	75	3	4	18.6	9	21	24.73	1.49	53.6	24.1	19	19	34.7	792	0.638889	0.777778	0.944444	45	39	36	0.621	0.7471	0.791	0.622	0.7453	0.7916	0.3105	0.3736	0.3955	0.311	0.3726	0.3958	40.6893	41.1513	43.8806	40.1644	41.0068	42.431	19.0844	17.9424	13.6567	19.2387	17.6975	13.7313	59.7737	59.0937	57.5373	59.465	58.6038
28	80	4	4	12.8	6	20	23.33	1.46	47.8	22.4	16	17	35.2	462	0.805556	0.944444	0.972222	31	27	27	0.9468	1.0758	1.0615	0.9493	1.0767	1.0633	0.4734	0.5379	0.5307	0.4747	0.5383	0.5316	40.8377	41.4206	41.965	39.3603	40.6699	40.9809	19.699	17.8771	16.9858	19.9607	17.9569	17.1524	60.5366	59.2977	58.9509	59.4241	58.6592
29	65	1	2	27.2	16	29	19.09	1.58	53.8	21.6	19	18	33	693	0.944444	1.11111	1.52778	26	24	22	1.0999	1.1967	1.3003	1.1041	1.1944	1.3088	0.5499	0.5983	0.6502	0.5521	0.5972	0.6544	39.5785	41.5042	45.3003	42.3017	43.814	45.0065	17.9547	14.7632	9.3995	18.345	14.5775	10.0522	57.5332	56.2674	54.6997	60.8119	58.3101
30	78	3	4	18.6	9	21	14.77	1.45	49.8	23.7	17	17	34.1	2079	0.666667	0.833333	0.916667	31	31	32	0.9477	0.9397	0.9082	0.9467	0.9404	0.9042	0.4738	0.4699	0.4541	0.4733	0.4702	0.4521	38.7987	40.5866	43.0425	37.649	41.5815	43.8812	23.5931	17.8035	13.266	23.4848	17.8718	12.8335	62.3918	58.3902	56.3086	61.0931	59.4816
31	70	2	1	17.5	9	28	11.38	1.55	52.5	21.9	17	20	38	2772	0.888889	1.19444	1.41667	25	23	20	1.1218	1.2568	1.3671	1.1236	1.2582	1.3671	0.5609	0.6284	0.6835	0.5618	0.6291	0.6835	38.5103	40.7603	41.4508	39.557	41.7722	43.0052	21.87	17.4234	15.544	22.0285	17.529	15.544	60.3803	58.1837	56.9948	61.6482	59.3453
32	84	4	3	17.3	6	18	11.3	1.46	61.4	28.8	20	25	40.6	5544	1.16667	1.27778	1.66667	26	24	20	1.1423	1.1743	1.3563	1.1455	1.1743	1.3563	0.5711	0.5871	0.6781	0.5727	0.5871	0.6781	40.9471	41.5669	44.086	42.4074	42.4374	46.0829	16.5274	15.9956	9.831	16.8059	15.9956	9.831	57.4745	57.5626	53.9171	59.3315	58.4331
33	82	4	4	17.2	9	22	18.51	1.52	50.8	22	18	16	31.7	1386	1	1.11111	1.36111	26	26	23	1.1136	1.1051	1.2311	1.11	1.101	1.2295	0.5568	0.5525	0.6155	0.555	0.5505	0.6148	40.5714	41.2249	43.3661	41.0319	42.1101	44.0344	18.5306	16.819	12.6536	18.2041	16.4534	12.5307	59.102	58.0439	56.0197	59.102	58.4095
34	70	1	2	26.7	9	30	15.5	1.56	64.3	26.4	23	22	34	1386	0.722222	0.861111	1.02778	33	31	27	0.8708	0.9611	1.0371	0.8667	0.9459	1.0353	0.4354	0.4806	0.5186	0.4333	0.4729	0.5176	35.782	37.4914	40.7207	40.2381	41.3165	41.065	24.1706	21.847	18.2883	23.6967	20.2619	18.1081	59.9526	59.3384	59.009	63.7441	60.9235
35	90	4	4	14.1	9	22	15.2	1.38	35.3	18.5	14	7	21.1	0	0.722222	0.944444	1.08333	36	30	27	0.8292	0.959	1.0705	0.8319	0.967	1.0705	0.4146	0.4795	0.5353	0.416	0.4835	0.5353	41.5895	43.2576	43.2383	39.3923	41.0969	42.7783	18.8895	15.303	13.9834	19.2161	16.1364	13.9834	60.479	58.5606	57.2217	58.7371	57.5758
36	76	1	2	19.7	9	27	13.25	1.5	65.2	29	19	29	44.8	1386	0.833333	1.13889	1.33333	30	27	24	0.9699	1.0882	1.2227	0.9692	1.0964	1.224	0.4849	0.5441	0.6113	0.4846	0.5482	0.612	40.9782	41.4843	44.2748	38.6243	41.8319	43.3551	20.423	16.3654	12.3228	20.3569	17.1265	12.4318	61.4012	57.8497	56.5976	58.9557	59.2769
37	76	2	1	17.9	9	26	11.16	1.5	66.7	29.6	20	29	43.7	0	0.888889	1.11111	1.33333	29	25	23	0.997	1.0822	1.2074	0.9963	1.0856	1.2074	0.4985	0.5411	0.6037	0.4981	0.5428	0.6037	41.159	41.7864	43.5583	41.3383	42.3746	44.2945	17.5334	15.7084	12.1472	17.4591	16.0164	12.1472	58.6924	57.4949	55.7055	58.7667	58.5216
38	75	1	2	19.3	9	27	12.73	1.54	68.4	28.8	23	26	37.8	3759	0.944444	1.22222	1.47222	27	23	21	1.0672	1.2507	1.3784	1.0681	1.2412	1.3802	0.5336	0.6254	0.6892	0.534	0.6206	0.6901	39.9035	40.9338	43.9252	38.5048	41.4661	43.3333	21.5607	17.9153	12.6836	21.6412	17.1553	12.8171	61.4642	58.8491	56.6088	60.177	58.3062
39	78	1	1	18.2	9	24	11.57	1.47	67.9	31.4	20	30	44.8	2346	0.888889	1	1.25	30	27	23	0.9853	1.0618	1.2514	0.9874	1.0591	1.2542	0.4927	0.5309	0.6257	0.4937	0.5295	0.6271	40.458	40.7534	41.2875	38.8504	39.3133	41.196	20.6107	20.0342	17.4251	20.8189	19.7774	17.6471	61.0687	60.7877	58.7125	59.7502	58.9897
40	66	4	4	15	6	17	16.4	1.44	53.8	25.9	19	19	35.6	1386	0.944444	1.08333	1.33333	30	27	24	0.9524	1.0351	1.1787	0.9488	1.0282	1.1747	0.4762	0.5175	0.5893	0.4744	0.5141	0.5873	40.656	42.0552	43.8914	43.4916	43.295	44.6084	16.0183	14.9382	11.6516	15.6369	14.2721	11.3122	56.6743	56.9933	55.543	58.9626	57.2788
41	76	1	2	22.1	16	29	16.08	1.49	64.1	28.9	18	30	47.3	975	0.833333	1	1.25	27	26	23	1.0674	1.1136	1.2278	1.0689	1.1055	1.2264	0.5337	0.5568	0.6139	0.5345	0.5527	0.6132	40.7381	40.4898	43.3258	39.1921	40.7895	43.0351	20.0142	19.0204	13.6878	20.1561	18.2857	13.5747	60.7523	59.5102	57.0136	59.4038	58.7755
42	72	3	3	27.8	9	21	9.4	1.57	54.7	22.2	20	17	30.8	0	0.888889	0.944444	1.25	22	28	23	0.8642	1.0357	1.2347	0.8652	1.0389	1.2389	0.4321	0.5179	0.6174	0.4326	0.5194	0.6194	44	41.5653	43.4196	42.5799	40.3788	41.5919	13.3714	17.9331	14.8481	13.4857	18.2371	15.1856	57.3714	59.4985	58.2677	56.1143	58.7386
43	73	1	1	19.3	9	28	9.17	1.45	55.9	26.6	18	21	38.1	0	0.805556	1.11111	1.33333	33	28	24	0.8873	1.0352	1.1587	0.8896	1.0324	1.1547	0.4436	0.5176	0.5793	0.4448	0.5162	0.5773	36.1868	38.9088	40.8516	40.621	43.9462	45.3811	23.0869	17.263	13.9241	23.3463	16.9946	13.5788	59.2737	56.1717	54.7756	64.0726	60.8229
44	87	1	2	21.7	9	25	18.94	1.49	47.5	21.4	17	15	31.8	0	0.611111	0.722222	0.888889	43	39	35	0.6803	0.749	0.8225	0.688	0.752	0.8225	0.3401	0.3745	0.4113	0.344	0.376	0.4113	38.5816	38.3437	40.634	38.4292	39.6045	41.2824	22.5532	21.8945	18.0836	23.6879	22.2915	18.0836	61.1348	60.2382	58.7176	62.5532	62.0533
45	67	1	1	23.5	9	27	6.52	1.5	47.9	21.3	18	14	28.2	2772	0.861111	1.13889	1.33333	28	23	23	1.047	1.1844	1.283	1.0463	1.1844	1.283	0.5235	0.5922	0.6415	0.5231	0.5922	0.6415	40.3016	42.8419	43.649	40.3978	42.3077	43.9954	19.3283	14.8504	12.3557	19.2598	14.8504	12.3557	59.6299	57.6923	56.0046	59.6299	57.1581
46	76	1	2	28.3	9	25	12.9	1.56	58.7	24.1	22	18	30.9	0	0.972222	1.36111	1.55556	24	21	21	1.1686	1.322	1.3786	1.1618	1.339	1.3767	0.5843	0.661	0.6893	0.5809	0.6695	0.6883	41.4309	43.8867	45.275	42.6778	43.9644	46.1864	16.1398	11.583	8.6037	15.5574	12.87	8.4626	57.5707	55.4698	53.8787	57.9867	57.4003
47	71	3	4	30.6	16	21	16.19	1.56	58.4	24	21	19	32.2	1188	0.805556	1.05556	1.30556	26	24	22	1.1446	1.2234	1.278	1.1593	1.2434	1.278	0.5723	0.6117	0.639	0.5796	0.6217	0.639	39.7953	42.5367	44.3814	40.4296	42.1902	44.3814	19.2578	14.5815	11.2372	20.5374	16.2209	11.2372	59.0531	57.1182	55.6186	61.4843	59.1027
48	84	4	4	15.9	6	16	14.56	1.43	47.2	23.1	15	18	38.3	6930	0.722222	0.805556	1.08333	36	35	30	0.8157	0.826	0.9608	0.8111	0.8297	0.9633	0.4078	0.413	0.4804	0.4056	0.4149	0.4817	38.0742	39.857	40.85	39.8998	37.8641	40.8304	22.2468	22.1066	18.2134	21.6934	22.5618	18.4735	60.321	61.9636	59.0633	61.3724	60.5982
49	85	2	1	16.1	9	29	11.2	1.5	58.5	26	19	22	37.7	0	0.777778	0.916667	1.41667	32	27	22	0.9122	1.0542	1.3395	0.9078	1.06	1.3395	0.4561	0.5271	0.6698	0.4539	0.53	0.6698	40.3776	42.1344	44.4183	40.2693	41.0377	44.1833	19.5493	16.6008	11.3984	19.0621	17.1542	11.3984	59.9269	58.7352	55.8167	59.1352	58.419
50	82	1	2	20.4	6	26	18.66	1.6	47.6	18.6	21	8	16.6	1680	0.972222	1.19444	1.38889	27	24	22	1.0535	1.1526	1.3179	1.0553	1.1503	1.3179	0.5268	0.5763	0.659	0.5277	0.5751	0.659	41.1074	44.0415	43.5597	42.0436	44.0291	45.3162	16.7785	12.0207	11.1241	16.9463	11.8135	11.1241	57.8859	56.0622	54.6838	59.0604	55.7513
51	80	3	4	19.2	6	21	25.5	1.56	60.6	24.9	19	25	41	0	0.583333	0.722222	0.805556	35	38	35	0.8174	0.7745	0.8469	0.8202	0.7753	0.8474	0.4087	0.3872	0.4235	0.4101	0.3877	0.4237	37.6784	39.989	40.3932	37.0318	38.5753	39.2269	25.1665	21.3933	20.3551	25.4995	21.503	20.4185	62.8449	61.3823	60.7483	62.6546	60.1207
52	73	1	2	25.7	6	30	16.29	1.58	71	28.4	23	29	40.9	3066	1	1.13889	1.47222	27	24	21	1.0755	1.1674	1.3563	1.0782	1.1617	1.36	0.5377	0.5837	0.6781	0.5391	0.5808	0.68	42.8571	43.2195	45.7259	42.2428	42.549	44.7903	14.7929	14.439	9.3623	15.0465	13.9512	9.6337	57.65	57.6585	55.0882	57.3964	56.2927
53	84	1	2	24	6	30	12.14	1.5	60.4	26.8	19	25	41.6	495	0.75	0.888889	1.22222	35	31	26	0.8255	0.9251	1.0989	0.828	0.9285	1.0978	0.4128	0.4626	0.5494	0.414	0.4643	0.5489	39.3095	40.4287	43.276	40.3986	41.0162	43.3198	20.1696	18.4035	13.4479	20.4724	18.7731	13.3468	59.4791	58.8322	56.724	60.9933	59.9409
54	75	1	2	18.6	6	25	15.02	1.52	59.6	25.8	22	18	30.4	99	0.777778	1	1.22222	34	28	25	0.8696	1.0225	1.1574	0.8773	1.0217	1.1611	0.4348	0.5113	0.5787	0.4387	0.5108	0.5806	38.879	39.6903	41.8163	38.0024	40.4568	42.8421	22.7788	19.8859	15.2059	23.6732	19.8044	15.5227	61.6577	59.5762	57.0222	62.0155	60.2282
55	73	1	2	25.8	6	30	17.3	1.53	80.8	34.5	22	41	50.6	495	0.833333	1	1.27778	27	25	23	1.0553	1.199	1.2352	1.0576	1.192	1.2324	0.5277	0.5995	0.6176	0.5288	0.596	0.6162	39.2678	40.1168	42.6437	37.106	38.4228	42.0507	23.5463	21.6847	15.4023	23.7617	21.1009	15.1724	62.8141	61.8015	58.046	60.9476	59.2994
56	77	1	2	25.9	6	30	12.62	1.53	52.2	22.3	19	17	31.8	0	1.02778	1.22222	1.5	26	23	22	1.1165	1.2195	1.3	1.1184	1.229	1.2967	0.5583	0.6098	0.65	0.5592	0.6145	0.6483	42.6778	42.7617	45.3846	43.2749	43.3149	46.401	13.9749	13.5857	8.3333	14.1423	14.3653	8.0769	56.6527	56.3474	53.7179	57.4895	58.0178
57	71	3	4	24.9	12	22	12.19	1.52	55.3	23.9	19	20	36.5	1533	0.972222	1.22222	1.5	19	16	13	1.0417	1.1713	1.3538	1.0375	1.1672	1.3425	0.5208	0.5856	0.6769	0.5188	0.5836	0.6713	41.6	42.9565	44.3213	42.838	45.3752	46.3687	15.7333	11.8261	9.6953	15.3333	11.4783	8.8643	57.3333	54.7826	54.0166	58	56.6957
58	86	4	4	11.7	9	19	18.42	1.57	55.4	22.5	19	19	34.5	1644	0.833333	0.916667	1.13889	21	20	16	0.9198	0.9465	1.118	0.9188	0.9476	1.1199	0.4599	0.4732	0.559	0.4594	0.4738	0.56	41.3364	42.615	44.652	43.424	43.7727	44.7458	15.2888	13.5593	10.5263	15.1755	13.6804	10.6961	56.6251	56.1743	55.1783	58.5504	57.5061
59	80	3	4	23.3	9	23	16.09	1.49	45.7	20.6	17	14	30	396	0.916667	1.13889	2.11111	17	15	13	1.0572	1.2118	2.0583	1.0572	1.2186	2.0636	0.5286	0.6059	1.0292	0.5286	0.6093	1.0318	41.3295	43.2331	44.8718	41.763	42.8037	44.757	16.9075	13.7218	10.2564	16.9075	14.2857	10.5128	58.237	56.9549	55.1282	58.6705	57.3308
60	76	3	3	22.9	9	23	10.09	1.48	65	29.7	21	26	40.5	3186	0.916667	1.19444	1.44444	19	16	13	1.0201	1.1944	1.3867	1.0214	1.1925	1.3794	0.5101	0.5972	0.6933	0.5107	0.5962	0.6897	41.2067	42.3333	43.4896	40.641	42.9048	43.9791	18.1001	14.8333	12.7604	18.2285	14.6667	12.2396	59.3068	57.1667	56.25	58.9217	57.5
61	79	1	2	19.8	9	29	12.39	1.52	59.1	25.6	19	23	38.5	1386	0.777778	1	1.13889	21	18	16	0.9158	1.01	1.1123	0.9149	1.0057	1.1104	0.4579	0.505	0.5562	0.4574	0.5029	0.5552	40.3397	42.1499	42.1502	39.2136	40.625	42.5641	20.4883	17.3975	15.3584	20.3822	16.9731	15.1877	60.828	59.5474	57.5085	59.5541	57.4257
62	75	1	2	23.6	12	28	12.9	1.52	68	29.4	21	29	42.2	1704	1.02778	1.27778	1.47222	16	14	13	1.1854	1.3161	1.4207	1.1819	1.3059	1.4097	0.5927	0.6581	0.7103	0.591	0.6529	0.7048	39.8844	40.9709	42.7461	41.5942	41.4873	43.6031	18.6416	17.8641	13.9896	18.3526	17.0874	13.2124	58.526	58.835	56.7358	59.8266	58.2524
63	72	1	2	26.1	12	25	18.07	1.53	50	21.4	19	15	29.8	297	0.972222	1.22222	1.38889	19	15	15	0.9986	1.1513	1.175	0.9972	1.1562	1.1778	0.4993	0.5757	0.5875	0.4986	0.5781	0.5889	42.9764	45.0106	46.8085	42.8969	43.9746	45.283	14.1864	10.828	7.8014	14.0473	11.2527	8.0378	57.1627	55.8386	54.6099	56.8846	55.414
64	72	1	2	26.5	12	28	18	1.54	48	20.2	18	16	32	1196	1.05556	1.16667	1.30556	26	25	24	1.1045	1.1632	1.1659	1.1064	1.1608	1.1593	0.5522	0.5816	0.5829	0.5532	0.5804	0.5797	43.3536	44.9348	45.6887	42.2376	42.4121	44.0315	14.3354	12.7382	10.5263	14.5091	12.5376	9.9664	57.689	57.673	56.215	56.8202	54.8646
65	74	1	2	32.9	16	29	14.94	1.59	61.2	24.2	23	19	31.4	1386	0.833333	1.02778	1.25	18	17	14	1.0214	1.098	1.25	1.0238	1.0912	1.2525	0.5107	0.549	0.625	0.5119	0.5456	0.6263	41.1422	42.4337	44.4	40	41.6013	43.513	18.7646	16.2246	12	18.9977	15.6006	12.2	59.9068	58.6583	56.4	59.0909	56.9423
66	74	1	2	33.7	16	27	14.4	1.59	62.2	24.6	24	19	30.8	2373	1	1.19444	1.5	25	22	21	1.098	1.2024	1.3463	1.103	1.2117	1.3481	0.549	0.6012	0.6731	0.5515	0.6058	0.6741	42.1676	42.936	46.3788	41.8858	41.1829	44.7844	15.7559	15.5629	8.7744	16.2113	16.3355	8.9137	57.9235	58.4989	55.1532	58.2878	57.8366
67	79	3	3	18	12	22	10.75	1.58	52.4	21	16	21	40.8	297	0.888889	1.02778	1.27778	20	18	16	0.9367	1.0395	1.1436	0.9367	1.0513	1.1457	0.4683	0.5198	0.5718	0.4683	0.5256	0.5729	39.6204	41.2429	43.3892	42.2301	42.5978	43.6803	18.1495	15.678	12.8492	18.1495	16.8079	13.0354	57.7699	56.9209	56.2384	60.3796	59.887
68	75	1	2	21.5	18	27	12.5	1.59	64.1	25.4	23	22	34.1	2079	0.805556	1.25	1.55556	20	14	14	0.9999	1.25	1.3036	0.9969	1.2275	1.2973	0.4999	0.625	0.6518	0.4984	0.6138	0.6487	40.0806	43.2	46.778	40.5051	43.7882	46.5228	19.5368	13.8	6.9212	19.2346	12	6.4439	59.6173	57	53.6993	59.6173	55
69	77	4	4	16.3	9	14	12.2	1.49	51.9	23.4	16	21	39.7	0	0.777778	0.972222	1.11111	23	19	17	0.8573	1.0069	1.0852	0.8564	1.0028	1.087	0.4286	0.5035	0.5426	0.4282	0.5014	0.5435	40.0202	41.931	43.0034	40.3633	42.5208	42.4191	19.6573	15.7241	14.5051	19.5565	15.3103	14.6758	59.6774	57.6552	57.5085	59.879	57.6552
70	81	3	4	22	12	20	12.87	1.49	56.2	25.3	18	22	38.7	297	0.777778	0.888889	1.11111	25	23	21	0.7747	0.7941	0.8569	0.7754	0.796	0.8611	0.3873	0.397	0.4285	0.3877	0.398	0.4306	41.1647	42.4129	43.2739	40.8225	42.3077	43.7097	17.9719	15.1741	12.8039	18.0723	15.4229	13.2901	59.1365	57.5871	56.0778	58.9357	57.8358
71	76	2	1	15.5	12	25	11.66	1.52	60.9	26.4	10	25	40.9	1386	1.08333	1.27778	1.58333	17	15	13	1.0635	1.1934	1.3538	1.0725	1.196	1.3498	0.5317	0.5967	0.6769	0.5363	0.598	0.6749	42.9542	44.5396	45.3216	41.5825	42.735	46.6276	15.1104	12.6338	8.1871	15.9593	12.848	7.8947	58.0645	57.1734	53.5088	57.8947	55.6745
72	85	4	3	14.1	9	20	10.77	1.47	52	24.1	18	19	35.6	693	0.777778	0.861111	1.08333	25	23	20	0.7622	0.8152	0.9032	0.7661	0.8181	0.8951	0.3811	0.4076	0.4516	0.3831	0.409	0.4476	40.102	40.493	41.6792	39.0863	41.2865	44.4781	20.6122	18.0751	14.2429	21.1224	18.4272	13.3433	60.7143	58.5681	55.922	60.4082	59.8592
73	81	4	4	15.2	9	13	15.57	1.55	60.5	25.2	18	26	42.1	1386	0.722222	0.888889	1.13889	21	19	17	0.8811	0.974	1.0895	0.8938	0.9727	1.0876	0.4406	0.487	0.5448	0.4469	0.4863	0.5438	41.1885	41.8514	43.0314	41.5152	40.9922	43.4555	16.7008	17.2099	13.5889	18.1352	17.0795	13.4146	57.8893	59.0613	56.6202	60.2459	58.0183
74	83	4	4	16.3	6	22	12.73	1.46	55.4	26	16	24	43.7	693	0.666667	0.805556	0.916667	25	23	20	0.758	0.8181	0.8972	0.7527	0.8208	0.9075	0.379	0.409	0.4486	0.3763	0.4104	0.4538	39.6658	41.1379	40.8685	38.5297	39.2585	41.4141	22.0756	19.4748	17.2414	21.372	19.8031	18.3908	61.7414	60.6127	58.1098	59.6306	59.1904
75	75	3	3	23.2	12	22	10.13	1.56	65.2	26.8	22	27	35.9	924	0.805556	1.02778	1.22222	22	18	17	0.8834	0.9911	1.0715	0.8798	0.9969	1.0735	0.4417	0.4955	0.5357	0.4399	0.4985	0.5368	40.2229	41.6296	43.346	39.3693	41.2371	42.8843	20.5674	16.8889	13.6882	20.1621	17.4815	13.8783	60.7903	58.5185	57.0342	59.3718	58.963
76	82	1	2	24.8	9	28	13	1.48	52.2	23.8	18	18	34.6	297	0.805556	1.02778	1.11111	21	21	19	0.9254	0.889	0.9556	0.9244	0.8942	0.9508	0.4627	0.4445	0.4778	0.4622	0.4471	0.4754	40.1523	40.4624	41.5282	41.8301	43.6782	45.2421	18.0631	15.6069	13.4551	17.9543	16.185	12.9568	58.2155	56.0694	54.9834	59.7388	60.1156
77	81	3	4	21.1	6	20	16.6	1.56	64.4	26.5	22	23	35.7	2226	0.5	0.583333	0.75	30	27	23	0.6285	0.7127	0.8025	0.6262	0.7186	0.8067	0.3142	0.3564	0.4013	0.3131	0.3593	0.4033	37.6989	39.1369	40.6023	37.715	36.679	39.876	24.7246	23.8839	19.3146	24.3574	24.7024	19.8339	62.4235	63.0208	59.9169	61.9339	61.6815
78	81	4	4	16.3	9	22	14.8	1.56	64.8	26.6	21	26	39.4	2226	0.611111	0.722222	0.916667	39	33	30	0.7696	0.861	0.9893	0.7725	0.8615	0.9935	0.3848	0.4305	0.4946	0.3863	0.4308	0.4968	38.1597	40.8628	41.1974	38.2038	39.0419	39.8155	23.4937	20.0719	18.8168	23.8674	20.1318	19.2445	61.6534	60.9347	60.0143	62.2139	59.1971
79	79	3	4	26.8	6	18	20	1.61	64	24.7	23	22	33.7	1584	0.777778	0.944444	1.27778	20	18	13	0.9119	1.0268	1.3768	0.9158	1.016	1.3768	0.456	0.5134	0.6884	0.4579	0.508	0.6884	40.4051	41.9185	43.8515	42.0382	41.4343	44.5476	17.3774	17.0828	11.6009	17.8038	16.0315	11.6009	57.7825	59.0013	55.4524	60.0213	57.0302
80	67	2	1	12.7	12	28	11.5	1.5	56.1	24.9	19	21	38	198	0.777778	0.944444	1.25	19	18	16	0.9633	1.0497	1.2125	0.9667	1.0524	1.2083	0.4817	0.5248	0.6063	0.4833	0.5262	0.6042	39.7924	41.0026	42.9553	38.9655	40.3846	43.6207	21.1073	18.509	13.5739	21.4533	18.7661	13.2302	60.8997	59.5116	56.5292	60.5536	59.2545
81	75	3	4	28.2	6	22	17	1.53	66.8	28.5	21	28	42	1386	0.722222	1.08333	1.33333	20	17	18	1.003	1.1176	1.621	1.0075	1.1393	1.5771	0.5015	0.5588	0.8105	0.5038	0.5697	0.7886	38.1638	41.6801	38.5429	37.9032	40.729	39.4928	23.7624	16.8013	23.0317	24.2124	18.7399	20.329	61.9262	58.4814	61.5746	62.2862	60.2585
82	78	4	4	15.6	6	14	15.1	1.54	56.8	24	19	21	36.1	33	0.805556	0.972222	1.19444	21	18	15	0.872	1.0236	1.118	0.876	1.0111	1.1228	0.436	0.5118	0.559	0.438	0.5056	0.5614	38.1062	40.4342	41.6667	38.1609	40.522	42.9787	23.5566	19.5387	15.1709	24.0185	18.3175	15.5983	61.6628	59.9729	56.8376	62.3557	58.3446
83	68	1	1	24.2	16	28	8.84	1.53	59	25.2	21	21	35.7	4380	0.805556	1	1.16667	26	24	22	1.0897	1.18	1.2976	1.0904	1.18	1.308	0.5448	0.59	0.6488	0.5452	0.59	0.654	40.6586	41.5254	42.7572	39.0866	41.6102	42.3191	20.2285	16.8644	14.5854	20.2957	16.8644	15.3846	60.8871	58.3898	57.3427	59.4086	58.4746
84	76	3	3	19.7	9	22	8.75	1.59	60.2	23.8	21	21	34.4	3492	0.805556	0.972222	1.25	26	26	24	1.1292	1.1181	1.2138	1.1322	1.1181	1.215	0.5646	0.559	0.6069	0.5661	0.559	0.6075	40.9209	42.8458	44.2842	40.5563	42.7668	44.7531	18.4176	14.3874	10.9166	18.677	14.3874	11.0196	59.3385	57.2332	55.2008	59.3385	57.1542
85	66	2	1	17.1	9	26	6.02	1.49	65.8	29.6	21	28	41.8	6138	0.805556	1.08333	1.27778	27	23	22	1.0736	1.2507	1.2764	1.0751	1.2543	1.2835	0.5368	0.6253	0.6382	0.5375	0.6271	0.6417	40.7231	41.6747	43.2703	40.1907	41.8426	43.1416	19.0314	16.3619	13.3482	19.1678	16.6506	13.9043	59.7544	58.0366	56.6185	59.4134	58.6141
86	72	2	1	15.5	12	28	7.97	1.49	44.9	20.2	19	10	22	8625	0.916667	1.16667	1.38889	28	25	24	1.0526	1.1643	1.2278	1.0572	1.1655	1.2403	0.5263	0.5822	0.6139	0.5286	0.5828	0.6201	41.6546	43.6874	44.3439	41.9075	43.4434	44.1209	16.2554	12.8257	11.086	16.6909	12.9259	12.1041	57.91	56.513	55.4299	58.7808	56.4128
87	72	3	3	24.8	12	21	7.25	1.5	56.5	25.1	21	18	31.7	4884	0.805556	0.944444	1.25	27	25	24	1.0787	1.1173	1.2375	1.0824	1.1154	1.235	0.5394	0.5586	0.6188	0.5412	0.5577	0.6175	41.1405	42.519	44.6465	40.1894	41.9983	43.4211	18.5336	15.5537	12.0202	18.873	15.3846	11.8182	59.6741	58.0727	56.6667	59.1989	57.3119
88	71	4	3	16.7	12	23	9.68	1.42	56.3	27.9	20	20	35	318	0.833333	1	1.30556	25	25	23	1.1367	1.141	1.2548	1.1358	1.141	1.2649	0.5683	0.5705	0.6274	0.5679	0.5705	0.6325	42.3021	42.4189	45.5491	43.7271	43.1201	45.0688	14.0029	14.461	9.0173	13.9296	14.461	9.8266	56.305	56.8799	54.5665	57.6246	57.5811
89	72	2	1	16.1	16	26	7.04	1.53	57.2	24.4	20	20	35.4	3276	1	1.19444	1.58333	25	24	19	1.182	1.21	1.4295	1.182	1.2148	1.4295	0.591	0.605	0.7148	0.591	0.6074	0.7148	42.3858	44.5212	46.2025	42.978	44.3461	46.0443	14.6362	10.9576	7.7532	14.6362	11.3524	7.7532	57.022	55.4788	53.9557	57.6142	55.8736
90	74	3	3	20.5	9	19	8.93	1.48	45.8	20.9	17	13	28.4	1182	0.777778	1.05556	1.36111	30	25	26	0.9902	1.0387	1.1062	0.9914	1.0513	1.1149	0.4951	0.5193	0.5531	0.4957	0.5257	0.5574	40.3021	43.8008	45.0783	41.8226	42.3695	44.5061	17.8248	13.313	10.0671	17.9456	14.5325	10.8501	58.1269	57.1138	55.1454	59.8187	57.4187
91	75	2	1	17.7	12	29	9.19	1.55	65.2	27.1	24	21	32.2	4212	0.722222	0.916667	1.13889	26	25	22	1.1411	1.1541	1.2477	1.1405	1.1541	1.2515	0.5706	0.577	0.6239	0.5702	0.577	0.6258	39.4131	39.7141	42.1907	38.0541	39.3963	40.8493	22.5547	20.8896	16.8357	22.4971	20.8896	17.14	61.9678	60.6037	59.0264	60.5293	60.2859
92	65	2	1	17.6	12	30	9.21	1.58	65	26	24	21	32.1	1386	0.916667	1.22222	1.5	24	23	21	1.1798	1.244	1.3069	1.1807	1.2385	1.3125	0.5899	0.622	0.6534	0.5903	0.6193	0.6563	41.5695	42.3581	45.3372	42.0807	43.8596	45	16.317	13.9738	9.4692	16.3947	13.5371	9.8996	57.8866	56.3319	54.8063	58.5082	57.2052
93	66	1	1	20.5	12	25	9.72	1.54	59.8	25.2	22	20	32.9	1355	0.833333	1.05556	1.25	24	23	21	1.2058	1.2127	1.2922	1.1983	1.2104	1.2906	0.6029	0.6064	0.6461	0.5992	0.6052	0.6453	40.2211	41.3926	42.4426	40.4729	41.376	42.4939	19.5577	17.3114	15.1149	18.9357	17.118	14.994	59.7789	58.7041	57.5574	59.1569	58.4139
94	78	1	1	21	9	28	5.59	1.53	61.9	26.4	22	22	35	2124	0.805556	1.44444	1.69444	29	21	19	1.0029	1.3632	1.4863	1.0016	1.356	1.4887	0.5015	0.6816	0.7431	0.5008	0.678	0.7443	38.1526	43.5762	44.2997	41.689	43.8083	45.5285	20.2142	12.8477	10.0977	20.0803	12.3179	10.2606	58.3668	56.4238	54.3974	61.7135	55.894
95	75	2	1	17.7	16	25	5.18	1.51	56.6	24.8	19	21	37.1	1173	1.05556	1.30556	1.75	24	23	19	1.2012	1.2055	1.4625	1.2076	1.2055	1.47	0.6006	0.6027	0.7313	0.6038	0.6027	0.735	40.949	43.201	47.0085	43.0944	43.201	46.0884	15.7293	13.5981	6.6667	16.2566	13.5981	7.1795	56.6784	56.799	53.6752	59.5782	56.799
96	72	1	2	27.1	12	25	12.56	1.62	52.9	20.2	20	16	30.9	2879	0.972222	1.38889	2.27778	24	21	14	1.1783	1.3056	2.0546	1.1803	1.3056	2.05	0.5892	0.6528	1.0273	0.5901	0.6528	1.025	41.5017	44.8138	45.2328	40.8567	44.8138	44.6667	17.5743	10.3723	10.1996	17.7393	10.3723	9.9778	59.0759	55.1862	55.4324	58.6634	55.1862
97	68	1	1	21.4	9	29	6.22	1.57	67	27.2	24	23	34.6	3573	0.944444	1.25	1.47222	24	21	21	1.2079	1.3281	1.3802	1.2108	1.3281	1.3765	0.604	0.6641	0.6901	0.6054	0.6641	0.6883	40.8913	43.1765	44.9333	40.3276	42.4706	45.0535	18.6865	14.3529	10.1333	18.921	14.3529	9.8667	59.5778	57.5294	55.0667	59.3432	56.8235
98	75	1	2	23	9	27	15.41	1.51	47.7	20.9	18	14	30.2	1173	0.888889	1.08333	1.52778	27	25	22	1.1047	1.1158	1.263	1.103	1.1137	1.2715	0.5523	0.5579	0.6315	0.5515	0.5568	0.6357	41.1851	43.4951	46.9086	43.2234	43.0934	45.3939	15.6547	13.4951	7.3925	15.5084	13.301	8.0645	56.8398	56.9903	54.3011	58.6686	56.3107
99	85	3	3	23.5	9	21	11.81	1.53	48.5	20.7	21	11	21.7	0	0.861111	1.02778	1.30556	25	26	22	1.1952	1.11	1.294	1.2004	1.1053	1.2867	0.5976	0.555	0.647	0.6002	0.5527	0.6433	41.6427	42.5084	43.8341	41.8938	43.2798	44.1939	16.2824	14.3939	12.2197	16.7147	13.9731	11.6592	57.9251	56.9024	56.0538	58.7896	57.0707
100	81	2	1	13.6	16	29	10.42	1.47	55.1	25.5	18	21	38.1	924	0.611111	0.777778	1	27	28	24	1.0767	1.0779	1.179	1.0711	1.0779	1.178	0.5383	0.5389	0.5895	0.5356	0.5389	0.589	40.2477	39.8076	41.1366	36.722	39.6272	42.1053	23.2198	20.5652	16.7939	22.7038	20.5652	16.7091	63.4675	60.3728	57.9304	59.2363	60.1924
101	71	1	2	22.7	12	27	13.06	1.54	56.3	23.7	20	19	32.9	1533	0.888889	1.33333	1.5	25	22	21	1.1218	1.283	1.3706	1.1244	1.283	1.3688	0.5609	0.6415	0.6853	0.5622	0.6415	0.6844	40.8875	43.8799	44.87	40.3953	43.649	43.8356	18.6212	12.4711	11.3543	18.859	12.4711	11.2175	59.5087	56.351	56.2244	59.3502	56.1201
102	69	1	2	21.9	12	26	15	1.49	47.1	21.2	18	13	27	792	1.05556	1.25	1.38889	23	22	23	1.2092	1.2278	1.2145	1.2033	1.2319	1.2161	0.6046	0.6139	0.6073	0.6017	0.616	0.608	41.0281	43.3258	44.2186	42.3977	44.1939	44.9239	16.7798	12.3303	10.8005	16.2949	12.6697	10.9276	57.808	55.6561	55.0191	58.4869	57.0136
103	66	2	1	17.6	12	29	11.41	1.58	51.7	20.7	20	14	27.5	924	0.805556	1.30556	1.52778	27	22	21	1.0685	1.2359	1.3444	1.0699	1.2388	1.3406	0.5342	0.618	0.6722	0.535	0.6194	0.6703	41.4668	45.6573	46.4489	39.4251	44.0281	45.1567	19.0541	10.2113	8.5227	19.1912	10.446	8.2386	60.5209	55.8685	54.9716	58.6703	54.5775
104	75	2	1	12.4	18	29	6.87	1.59	63.2	25	24	19	30.6	12264	1.16667	1.44444	1.75	22	20	19	1.2872	1.43	1.4325	1.2859	1.43	1.4325	0.6436	0.715	0.7163	0.643	0.715	0.7163	43.9074	44.8232	47.1204	42.3387	44.0657	46.0733	13.7966	11.1111	6.8063	13.6959	11.1111	6.8063	57.7039	55.9343	53.9267	55.9919	55.1768
105	76	2	1	14.4	16	28	8.88	1.42	51.9	25.7	17	19	36.5	1173	0.805556	1.08333	1.30556	27	25	22	1.0794	1.1592	1.2824	1.0831	1.1603	1.2954	0.5397	0.5796	0.6412	0.5416	0.5801	0.6477	40.2985	41.4953	43.6652	39.3509	42.2969	43.3371	20.2171	16.1682	12.5566	20.5563	16.2617	13.5747	60.5156	57.6636	56.2217	60.0407	58.5981
106	74	3	3	20.8	16	23	11.19	1.51	61.1	26.8	22	21	34.2	1182	0.888889	1.13889	1.30556	28	27	24	1.0296	1.0737	1.145	1.0296	1.0726	1.1515	0.5148	0.5368	0.5725	0.5148	0.5363	0.5758	40.0719	41.4658	43.3295	40.4317	41.6023	42.4036	19.4964	16.972	14.0251	19.4964	16.8756	14.5952	59.5683	58.4378	57.3546	59.9281	58.4378
107	67	1	2	20	16	28	13.41	1.58	63.3	25.4	23	21	33.4	3306	0.944444	1.22222	1.55556	25	23	21	1.1749	1.2562	1.365	1.1739	1.2548	1.365	0.5874	0.6281	0.6825	0.587	0.6274	0.6825	41.1576	42.4865	45.2991	41.1102	43.8312	45.0142	17.7653	13.7297	9.6866	17.6849	13.6216	9.6866	58.9228	56.2162	54.9858	58.7621	57.4054
108	75	4	3	15.5	9	23	6.97	1.53	55.1	23.5	20	17	31.2	1173	0.888889	1.22222	1.38889	26	23	20	1.1257	1.2725	1.3872	1.124	1.2684	1.3872	0.5628	0.6362	0.6936	0.562	0.6342	0.6936	38.6217	42.2625	42.9287	39.5399	42.2912	43.179	21.8952	15.5816	13.8924	21.7516	15.2615	13.8924	60.5169	57.8442	56.821	61.2347	57.4173
109	74	3	3	24.7	12	20	9.66	1.58	57.1	22.9	24	13	22.2	5826	0.75	1.11111	1.30556	29	26	23	0.995	1.1354	1.2374	0.9975	1.1354	1.2374	0.4975	0.5677	0.6187	0.4988	0.5677	0.6187	40.6407	43.3274	45.1348	40.1003	42.2598	45.6038	19.1583	14.4128	9.2614	19.4095	14.4128	9.2614	59.799	57.7402	54.3962	59.6106	56.6726
110	66	1	1	19.4	9	27	6.08	1.58	65	26	25	20	31.1	2044	1.08333	1.16667	1.44444	24	24	22	1.196	1.1585	1.2968	1.1971	1.1585	1.2952	0.598	0.5793	0.6484	0.5985	0.5793	0.6476	38.7681	39.8792	42.0792	39.3665	40.8862	43.3705	21.8297	19.2346	14.604	21.9203	19.2346	14.4802	60.5978	59.1138	56.6832	61.3225	60.1208
111	79	2	1	16.9	16	25	8.13	1.46	60.1	28.2	19	24	40.5	918	0.944444	1.13889	1.47222	26	25	23	1.1333	1.1275	1.2121	1.1308	1.1252	1.2105	0.5667	0.5638	0.6061	0.5654	0.5626	0.6052	40.4545	40.101	42.915	39.5596	41.9028	43.3784	20.0758	18.0808	13.7652	19.8485	17.8788	13.6302	60.5303	58.1818	56.6802	59.3182	59.697
112	67	1	2	23.6	12	25	12.31	1.47	65.1	30.1	22	25	38.7	9090	0.638889	1.19444	1.52778	35	25	21	0.8276	1.1741	1.2967	0.8276	1.1718	1.2948	0.4138	0.5871	0.6484	0.4138	0.5859	0.6474	37.0046	41.8108	43.5935	39.0633	42.5076	43.8053	23.9321	15.7681	12.6657	23.9321	15.5646	12.5184	60.9367	57.5788	56.2592	62.9954	57.9858
113	64	1	1	24.4	12	28	9.43	1.57	75.1	30.5	26	28	37.5	4959	1.13889	1.36111	1.52778	24	20	20	1.2027	1.3781	1.4056	1.2027	1.3764	1.4017	0.6013	0.6891	0.7028	0.6013	0.6882	0.7009	42.1402	43.2099	45.1087	41.3826	43.3869	44.5504	16.4773	13.4568	10.462	16.4773	13.3333	10.1902	58.6174	56.6667	55.5707	57.8598	56.6667
114	69	1	1	24.7	12	25	8.5	1.56	65.9	27.1	19	30	45.5	1120	1.05556	1.25	1.41667	25	24	23	1.1263	1.1725	1.2325	1.1199	1.1775	1.2341	0.5631	0.5863	0.6163	0.56	0.5888	0.617	41.8932	43.8166	44.3167	41.1876	42.6752	43.3673	17.1509	13.3262	12.2605	16.5886	13.7527	12.3883	59.044	57.1429	56.5773	57.5445	56.6098
115	69	2	1	5.1	16	26	9.62	1.55	73	30.4	20	36	49.2	3519	0.888889	1.08333	1.47222	27	26	23	1.0513	1.108	1.199	1.0546	1.107	1.2023	0.5257	0.554	0.5995	0.5273	0.5535	0.6012	40.1998	41.7778	44.6112	40.7663	41.9039	43.6735	18.9085	16.3556	11.5962	19.216	16.2667	11.869	59.1084	58.1333	56.2074	60.1076	58.1333
116	66	3	3	19.3	12	23	5.39	1.45	56.6	26.9	18	23	41.2	3306	0.888889	1.27778	1.5	25	22	20	1.1058	1.2281	1.3763	1.1076	1.2324	1.3744	0.5529	0.614	0.6881	0.5538	0.6162	0.6872	39.6302	42.5434	43.5967	42.0546	43.4332	44.6112	18.2476	13.8728	11.8529	18.4084	14.2197	11.7166	57.8778	56.4162	55.4496	60.5305	57.8035
117	69	1	2	21.3	16	29	12.53	1.66	67.6	24.5	28	18	26.5	2799	1.05556	1.25	1.5	23	23	23	1.2655	1.2361	1.2733	1.269	1.2375	1.2683	0.6327	0.6181	0.6367	0.6345	0.6188	0.6342	42.354	43.2584	44.7644	40.8503	42.8732	44.9409	16.6821	13.8202	10.4712	16.9601	13.9326	10.0785	59.0361	57.0787	55.2356	57.924	56.8539
118	79	1	1	22.9	18	25	8.59	1.59	61.5	24.3	22	21	33.4	594	0.833333	1.13889	1.52778	30	25	21	0.9577	1.1024	1.2948	0.9545	1.1013	1.2948	0.4788	0.5512	0.6474	0.4772	0.5507	0.6474	39.2905	41.9421	45.1327	39.4896	41.5719	44.9853	21.3521	16.5289	9.882	21.0174	16.4256	9.882	60.6426	58.4711	55.0147	60.3748	57.9545
119	76	2	1	15.8	9	27	8.07	1.53	48.7	20.8	19	12	25.5	3279	0.888889	1.36111	1.61111	29	23	21	1	1.2386	1.3251	0.9985	1.2356	1.3292	0.5	0.6193	0.6626	0.4993	0.6178	0.6646	39.4815	43.4676	46.3526	40.4303	44.3084	46.3636	20.1481	12.3321	7.1429	20	12.0879	7.4468	59.6296	55.7998	53.4954	60.3704	56.2882
120	73	1	2	19.2	12	27	12.1	1.49	52.2	23.5	19	17	32.4	1386	0.888889	1.19444	1.61111	28	23	20	1.0859	1.213	1.4057	1.0926	1.2183	1.4077	0.543	0.6065	0.7028	0.5463	0.6092	0.7039	40.1091	43.2166	45.9885	41.0847	42.8105	45.4936	18.5539	13.7856	8.4527	19.1678	14.2232	8.596	58.663	57.0022	54.4413	60.5048	57.221
121	71	2	1	12.9	16	28	6.16	1.53	49.6	21.2	18	16	32.7	1314	0.861111	1.25	1.63889	26	22	19	1.0811	1.2806	1.4516	1.085	1.2806	1.4493	0.5405	0.6403	0.7258	0.5425	0.6403	0.7246	39.4642	42.8416	45.4839	37.8788	43.0586	45.3958	22.5199	14.0998	9.1936	22.882	14.0998	9.0323	61.9841	56.9414	54.6774	60.8979	57.1584
122	72	2	1	14.7	9	25	9.94	1.58	66.1	26.5	22	25	38	2346	0.972222	1.11111	1.55556	25	26	20	1.1472	1.1212	1.4019	1.1443	1.1192	1.4078	0.5736	0.5606	0.701	0.5722	0.5596	0.7039	40.2542	41.7117	44.3828	41.6313	42.509	44.4751	18.2203	15.8559	10.957	17.9661	15.6757	11.3731	58.4746	57.5676	55.3398	59.4915	58.1081
123	73	1	2	25.2	16	27	12.78	1.56	64.1	26.3	22	23	36.3	1095	0.944444	1.11111	1.63889	24	23	18	1.1702	1.2494	1.5218	1.1683	1.2506	1.5195	0.5851	0.6247	0.7609	0.5841	0.6253	0.7597	39.7094	40.8103	43.0769	40.097	41.7572	44.53	20.2583	17.3913	12.4615	20.0969	17.4901	12.3077	59.9677	58.2016	55.5385	60.1291	59.2885
124	71	3	3	21.1	9	22	8.97	1.54	62.9	26.5	23	20	32	6426	0.722222	1.05556	1.38889	29	24	20	1.0298	1.1896	1.4132	1.0304	1.1928	1.4219	0.5149	0.5948	0.7066	0.5152	0.5964	0.7109	36.7621	37.9769	41.0319	36.8575	38.9381	41.514	26.3589	22.9814	17.199	26.4173	23.2476	17.8133	63.121	60.9583	58.231	63.2963	62.2893
125	76	2	1	15.5	16	27	8.31	1.47	46.5	21.5	17	15	32.3	1752	0.861111	1.08333	1.41667	27	27	23	1.0545	1.0567	1.2419	1.0513	1.0508	1.2451	0.5272	0.5284	0.621	0.5257	0.5254	0.6225	41.4254	42.3113	45.2471	42.2934	43.2052	45.1327	16.4068	14.7251	9.5057	16.1099	14.1659	9.7592	57.8322	57.0363	54.7529	58.2777	57.1295
126	76	2	1	13.8	9	30	11.28	1.42	53.5	26.5	18	20	36.6	1350	0.805556	1	1.22222	27	26	24	1.0311	1.0982	1.1904	1.0326	1.1018	1.1929	0.5156	0.5491	0.5952	0.5163	0.5509	0.5964	40.625	41.8874	43.6345	40.2837	40.9241	41.9057	19.0341	17.053	14.3737	19.1761	17.3841	14.5791	59.6591	58.9404	58.0082	59.517	58.4437
127	69	1	1	19.1	16	27	8.52	1.6	65.7	25.7	23	23	34.9	1293	0.805556	1.16667	1.55556	28	25	21	1.0338	1.1375	1.3669	1.0304	1.1387	1.3631	0.5169	0.5688	0.6835	0.5152	0.5693	0.6815	38.3117	41.2308	43.67	38.3062	41.4959	44.0799	23.5065	17.2308	12.3755	23.1818	17.3333	12.091	61.8182	58.4615	56.0455	61.3636	58.8718
128	74	4	4	16.8	16	23	12.34	1.62	66.7	25.4	23	25	37.5	2192	0.944444	1.19444	1.38889	25	23	22	1.1919	1.2542	1.2377	1.1862	1.2489	1.2469	0.5959	0.6271	0.6188	0.5931	0.6244	0.6235	40.8082	43.0688	45.1372	41.0032	43.3581	43.6881	18.3835	13.7566	10.8479	17.9081	13.3333	11.596	59.1918	56.8254	55.985	58.7163	56.5079
129	74	1	1	24.7	16	25	8.89	1.53	53.7	22.9	19	19	34.5	3588	0.861111	1.13889	1.41667	26	24	21	1.0897	1.1742	1.3759	1.0866	1.1753	1.3919	0.5448	0.5871	0.688	0.5433	0.5877	0.6959	39.9425	42.289	43.8867	41.3545	42.5388	43.1298	18.8218	15.1309	12.4839	18.5345	15.2279	13.6422	58.7644	57.42	56.3707	59.7701	57.808
130	69	2	1	16.6	16	24	8.28	1.58	51.6	20.7	20	15	28.8	693	0.75	1.16667	1.5	26	23	20	1.0718	1.2756	1.4156	1.0739	1.2743	1.41	0.5359	0.6378	0.7078	0.5369	0.6371	0.705	37.2137	40.752	42.649	37.9683	41.2004	43.617	24.7455	18.0894	13.9073	24.9364	17.9878	13.5099	61.9593	58.8415	56.5563	62.9771	59.1463
131	73	1	1	24.8	9	25	7.87	1.48	63.2	28.9	20	26	40.3	2355	0.833333	1.25	1.52778	28	24	22	1.0208	1.1863	1.2715	1.025	1.1863	1.2647	0.5104	0.5931	0.6357	0.5125	0.5931	0.6323	38.8435	41.3066	43.1242	38.4824	41.3066	43.8926	22.517	17.3867	13.2176	22.9252	17.3867	12.6836	61.3605	58.6934	56.3418	61.5646	58.6934
132	73	4	4	11.1	9	21	12.62	1.34	57.5	32	16	27	46.8	1644	0.944444	1.22222	1.44444	25	22	21	1.1824	1.2752	1.3668	1.1834	1.2779	1.3831	0.5912	0.6376	0.6834	0.5917	0.639	0.6915	42.3323	43.8765	45.7067	42.937	44.4208	44.7781	14.6965	11.6081	8.9828	14.7764	11.8211	10.1717	57.0288	55.4846	54.6896	57.7476	56.3365
133	68	2	1	13	18	30	5.14	1.5	55.8	24.8	19	20	35.9	4212	0.777778	1.25	1.63889	27	24	21	1.0507	1.1988	1.3152	1.0535	1.195	1.3173	0.5254	0.5994	0.6576	0.5268	0.5975	0.6586	39.6366	41.7101	44.8598	39.5302	42.9916	45.5677	20.7268	15.4327	9.5016	20.996	15.1199	9.6573	60.3634	57.1429	54.3614	60.6326	57.9771
134	66	1	2	25.8	12	25	12.22	1.55	75.3	31.3	26	28	37.7	6159	1.08333	1.19444	1.33333	23	23	21	1.235	1.2037	1.3367	1.2362	1.2077	1.3367	0.6175	0.6019	0.6683	0.6181	0.6039	0.6683	41.6179	41.7861	42.6434	40.7011	41.8681	42.5187	17.6413	16.2073	14.8379	17.7388	16.538	14.8379	59.2593	57.9934	57.4813	58.4795	58.5447
135	66	3	3	25.8	12	22	8.94	1.7	70.5	24.4	28	20	27.7	1786.5	1.11111	1.44444	1.61111	22	20	20	1.2716	1.4065	1.4581	1.2691	1.4101	1.4661	0.6358	0.7033	0.729	0.6346	0.7051	0.7331	42.1359	44.801	46.4088	42.7043	45.0704	46.0165	15.2427	10.0128	7.3204	15.0485	10.2696	7.8729	57.3786	54.8139	53.7293	57.6699	55.4557
136	65	1	1	23.5	16	30	8.28	1.61	53.7	20.7	19	18	33.4	4092	0.916667	1.30556	1.61111	21	20	19	1.3017	1.3839	1.4937	1.304	1.3823	1.4799	0.6508	0.6919	0.7469	0.652	0.6911	0.74	39.0845	41.7453	43.4515	39.5431	41.4404	44.479	21.3028	16.8632	12.4807	21.4789	16.7453	11.5562	60.3873	58.6085	55.9322	61.0915	58.1368
137	73	2	1	16.2	16	28	10.29	1.57	56.5	22.9	20	19	33	1653	1	1.25	1.55556	26	25	22	1.1	1.1375	1.2462	1.1027	1.1325	1.2496	0.55	0.5688	0.6231	0.5514	0.5663	0.6248	40.4959	42.1978	45.0763	40.3957	42.8256	44.1217	19.0083	15.1648	10.6796	19.2562	14.7253	10.957	59.5041	57.3626	55.7559	59.7521	57.3626
138	67	2	1	17.1	16	29	7.2	1.51	45.8	20.1	17	14	31	3252	0.833333	1.05556	1.36111	24	24	21	1.1692	1.1917	1.3475	1.1658	1.1917	1.3492	0.5846	0.5959	0.6738	0.5829	0.5959	0.6746	38.489	41.5412	43.0556	40.5289	41.8069	44.6406	21.0976	16.6519	12.2475	20.8125	16.6519	12.3737	59.5866	58.1931	55.303	61.2259	58.4588
139	75	2	1	17	12	25	11.28	1.55	55.7	23.2	20	19	33.3	2079	0.916667	1.36111	1.69444	28	24	20	1.0374	1.2128	1.3704	1.0351	1.2128	1.364	0.5187	0.6064	0.6852	0.5175	0.6064	0.682	41.0162	44.3322	45.4405	42.6568	45.3423	46.8944	16.4212	10.3255	7.8825	16.2003	10.3255	7.4189	57.4374	54.6577	53.323	58.7629	55.6678
140	65	3	3	21.6	9	22	6.09	1.45	48.7	23.2	18	16	31.9	506.5	0.833333	1.25	1.58333	28	23	21	1.0583	1.2139	1.3755	1.059	1.2153	1.3775	0.5292	0.6069	0.6878	0.5295	0.6076	0.6888	40.2231	43.2494	45.6115	41.7049	44.8	46.5517	18.0446	11.8993	7.7698	18.1102	12.0137	7.9137	58.2677	55.1487	53.3813	59.8425	56.865
141	72	2	1	17.5	9	25	8.19	1.49	51.3	23.1	19	16	31	6582	0.833333	0.972222	1.5	27	27	20	1.0439	1.0739	1.3688	1.0394	1.0677	1.3725	0.522	0.5369	0.6844	0.5197	0.5338	0.6863	39.7678	39.3416	44.1096	39.723	40.4801	42.7596	20.6821	20.4115	13.0137	20.2467	19.8354	13.2877	60.4499	59.7531	57.1233	59.7968	60.0823
142	68	3	3	21.8	12	22	10.85	1.62	74.6	28.4	28	24	31.8	1277.5	0.666667	1.08333	1.52778	34	28	22	0.8698	1.0373	1.2545	0.8707	1.0391	1.2511	0.4349	0.5186	0.6272	0.4353	0.5195	0.6255	38.5795	41.2533	44.249	38.9995	41.616	43.962	22.3812	17.0583	11.908	22.4834	17.2324	11.6373	60.9607	58.3116	56.157	61.5227	58.9208
143	68	3	4	22.4	9	23	12.5	1.58	71.6	28.7	25	27	37	9198	0.972222	1.33333	1.58333	25	22	21	1.1453	1.2904	1.3735	1.1453	1.2919	1.3795	0.5726	0.6452	0.6868	0.5726	0.6459	0.6897	40.6621	42.5947	43.3718	41.4261	42.6606	42.7547	17.9117	14.6958	13.6888	17.9117	14.8106	14.121	58.5739	57.2905	57.0605	59.3379	57.5201
144	78	3	3	26.5	9	23	7.19	1.53	53.9	23	21	15	27.1	3057	1.05556	1.27778	1.58333	23	22	19	1.2374	1.2962	1.4589	1.235	1.2962	1.4589	0.6187	0.6481	0.7295	0.6175	0.6481	0.7295	41.7062	43.483	44.9612	42.5451	44.2497	46.6667	15.8294	12.2673	8.3721	15.6398	12.2673	8.3721	57.5355	55.7503	53.3333	58.1043	56.517
145	69	2	1	17	9	27	8.19	1.52	69.6	30.1	22	29	41.1	1893	0.777778	1.02778	1.5	31	28	23	0.9668	1.0269	1.2683	0.9656	1.0252	1.27	0.4834	0.5135	0.6342	0.4828	0.5126	0.635	39.4802	41.9516	44.9409	40.2726	41.5205	44.0945	20.297	16.5972	10.9067	20.1733	16.4304	11.0381	59.7772	58.5488	55.8476	60.396	57.8816
146	77	3	4	22.3	9	23	12.78	1.56	80.3	33	21	41	50.6	657	0.777778	1	1.11111	30	27	25	0.9674	1.0555	1.1289	0.9692	1.0564	1.1333	0.4837	0.5277	0.5644	0.4846	0.5282	0.5667	39.5176	41.3437	42.5197	39.3827	40.7057	41.7647	21.0266	17.9156	15.5512	21.2121	18.0017	15.9449	60.5442	59.2593	58.0709	60.6679	58.7425
147	77	1	2	18.3	9	27	19.72	1.51	52.4	23	19	16	31.2	2799	1.02778	1.44444	1.63889	24	20	19	1.1933	1.3939	1.4493	1.1984	1.3957	1.4516	0.5966	0.6969	0.7246	0.5992	0.6978	0.7258	40.6546	43.1347	44.4265	42.1955	44.2432	45.6452	16.9681	12.5648	9.8546	17.3988	12.6943	10.0162	57.6227	55.6995	54.2811	59.7761	56.9948
148	78	2	1	16.7	16	26	6.37	1.57	57.6	23.4	19	21	36.8	3093	1.02778	1.27778	1.52778	24	22	20	1.1922	1.2934	1.4399	1.1953	1.2934	1.4476	0.5961	0.6467	0.72	0.5977	0.6467	0.7238	41.5517	44.5664	46.4191	41.5305	44.3469	45.7784	16.8103	11.0867	7.5597	17.069	11.0867	8.0902	58.3621	55.6531	53.9788	58.7069	55.4336
149	77	3	3	18.6	9	23	9.81	1.52	59.2	25.6	22	19	31.4	5251	0.861111	1.08333	1.38889	25	26	24	1.1642	1.0853	1.2083	1.1634	1.0853	1.2083	0.5821	0.5427	0.6042	0.5817	0.5427	0.6042	38.3136	42.196	43.4483	42.117	42.922	45.0575	19.6006	14.882	11.4943	19.5266	14.882	11.4943	57.9142	57.078	54.9425	61.6124	57.804
150	76	4	4	6	9	14	31.75	1.48	55.3	25.2	19	20	35.4	1533	0.583333	0.638889	0.805556	40	33	33	0.7311	0.9086	0.8838	0.7292	0.9054	0.8861	0.3656	0.4543	0.4419	0.3646	0.4527	0.4431	36.7021	36.5143	39.6484	37.6	36.9456	37.4026	25.7979	26.67	22.8516	25.5319	26.3184	23.112	62.5	63.1843	62.5	63.0319	63.1341
151	75	3	3	18.9	9	22	11.35	1.65	71.4	26.2	27	23	31.6	0	0.916667	1.16667	1.30556	28	24	24	1.0473	1.148	1.1802	1.0496	1.1503	1.1828	0.5236	0.574	0.5901	0.5248	0.5752	0.5914	40.0438	42.2764	43.9159	40.0291	42.5963	43.7086	19.8395	15.0407	12.2788	20.0584	15.2439	12.5	59.8833	57.3171	56.1947	60.1751	57.9268
152	74	2	1	17.1	12	28	6.62	1.54	49.7	21	19	15	29.9	1413	0.833333	1.02778	1.5	26	26	21	1.1008	1.1109	1.3444	1.1008	1.1091	1.3538	0.5504	0.5555	0.6722	0.5504	0.5545	0.6769	37.9215	39.7813	44.212	37.9904	40.6066	43.2133	24.0881	19.6804	12.2734	24.0881	19.5122	12.9707	62.0096	59.4617	56.4854	62.0785	60.0505
153	69	3	3	19.8	12	23	11.32	1.58	65.5	26.2	22	25	37.5	1590	0.722222	1	1.27778	26	24	22	1.1477	1.211	1.2863	1.1483	1.212	1.2863	0.5738	0.6055	0.6431	0.5742	0.606	0.6431	39.3593	40.0495	42.2737	39.3939	41.1716	43.5982	21.2243	18.7448	14.128	21.2815	18.8274	14.128	60.5835	58.7944	56.4018	60.6979	60.033
154	78	4	4	16.1	9	15	14.12	1.5	58.2	25.9	20	21	35.8	2772	0.722222	0.861111	1.19444	36	33	27	0.8066	0.8611	1.0229	0.8071	0.8599	1.0229	0.4033	0.4306	0.5114	0.4035	0.4299	0.5114	40.0112	41.7143	44.3737	40.9396	41.2732	43.949	19.0263	17.0714	11.6773	19.0823	16.9286	11.6773	59.0375	58.7857	56.051	60.0448	58.1429
155	68	3	3	26.5	9	23	6.35	1.59	68.6	27.1	22	27	39.4	8736	0.75	1.22222	1.36111	28	22	21	1.0788	1.3132	1.3849	1.0806	1.3132	1.3781	0.5394	0.6566	0.6925	0.5403	0.6566	0.6891	38.5863	41.5719	42.2604	39.2134	42.606	43.5802	22.1321	15.8221	14.3735	22.3059	15.8221	13.8821	60.7184	57.394	56.6339	61.5875	58.4281
156	78	2	1	14.4	9	28	9.44	1.5	52.8	23.5	17	19	36.5	4878	1	1.27778	1.55556	25	23	19	1.152	1.238	1.3956	1.15	1.2437	1.3956	0.576	0.619	0.6978	0.575	0.6219	0.6978	40.7986	42.6606	44.7452	41.1304	42.5799	44.1083	18.1424	14.5642	11.1465	17.9688	15.0229	11.1465	58.941	57.2248	55.8917	59.0278	57.7982
157	77	4	4	16.4	9	20	14.13	1.37	35.8	19.1	14	8	23.1	1470	1	1.41667	1.61111	23	20	19	1.2333	1.4025	1.5075	1.2278	1.4078	1.4914	0.6167	0.7013	0.7538	0.6139	0.7039	0.7457	42.4324	45.8333	46.1069	45.3394	46.2893	48.3025	12.4324	7.702	6.1069	11.982	8.0808	5.0382	54.8649	53.5354	52.2137	57.1171	54.5455
158	81	4	3	13.3	9	22	11.65	1.52	46	19.9	19	10	22.1	5439	0.638889	0.805556	1.05556	29	29	25	1.0499	1.0163	1.1316	1.0488	1.0184	1.1358	0.525	0.5082	0.5658	0.5244	0.5092	0.5679	38.9959	41.7437	44.4963	38.5279	41.1338	43.0297	22.5152	17.041	12.3134	22.4138	17.2391	12.6866	61.5112	58.7847	56.8097	60.9026	58.4544
159	75	1	1	21.7	16	25	6.81	1.54	60.9	25.7	22	21	33.7	2544	1	1.22222	1.41667	26	24	22	1.1082	1.1868	1.2624	1.1036	1.1868	1.2656	0.5541	0.5934	0.6312	0.5518	0.5934	0.6328	40.361	41.8126	43.3915	40.7743	42.1215	43.2836	19.032	16.0659	13.217	18.6218	16.0659	13.4663	59.3929	57.8785	56.6085	59.2289	58.1874
160	77	3	3	19.5	9	23	11.04	1.46	57.8	27.1	19	22	38.4	1533	0.861111	1.08333	1.5	28	27	22	1.0197	1.0577	1.2783	1.0176	1.0558	1.2833	0.5099	0.5289	0.6392	0.5088	0.5279	0.6417	41.1682	42.1788	45.7627	40.6911	41.9776	44.6753	18.2266	15.9218	9.3872	18.0155	15.7356	9.7784	59.3948	58.1006	55.1499	58.6207	57.635
161	78	3	4	23.2	9	20	12.1	1.53	61.7	26.4	21	22	35	1404	0.75	0.944444	1.47222	31	28	22	0.9156	1.0224	1.2988	0.9115	1.0232	1.2956	0.4578	0.5112	0.6494	0.4558	0.5116	0.6478	40.7057	40.8006	45.0882	36.7722	38.9231	42.9293	22.6843	20.2463	12.0907	22.2432	20.3233	11.8388	63.39	61.047	57.1788	58.8532	59.2764
162	77	3	4	22.9	9	21	14.32	1.55	64.8	27	23	22	33.4	2106	0.805556	1.11111	1.33333	24	21	21	1.2244	1.3639	1.3783	1.2253	1.3625	1.3783	0.6122	0.6819	0.6892	0.6126	0.6813	0.6892	41.0526	42.7699	43.289	39.645	42.6096	43.0472	19.2763	14.664	13.6638	19.3421	14.5621	13.6638	60.3289	57.4338	56.9528	59.0132	57.1283
163	77	4	3	15.5	9	20	9.81	1.57	63.8	25.9	21	24	38	4879	0.833333	1.13889	1.61111	25	24	20	1.1525	1.1708	1.3755	1.145	1.1765	1.3896	0.5763	0.5854	0.6877	0.5725	0.5882	0.6948	39.9855	42.0233	45.0952	40.4658	42.2072	45.3623	19.812	15.5642	9.0776	19.1612	16.0506	10.1025	59.7975	57.5875	54.1728	59.3637	58.463
164	75	3	3	20.6	9	23	10.13	1.56	65.8	27	23	24	36.3	7146	0.916667	1.08333	1.47222	27	24	21	1.0908	1.1863	1.3692	1.0858	1.1841	1.3839	0.5454	0.5931	0.6846	0.5429	0.592	0.6919	38.7319	39.8174	42.7419	39.7544	40.6221	43.0851	21.696	19.6347	13.7097	21.2376	19.4521	14.7849	60.4278	59.4521	56.4516	60.8098	60
165	74	3	4	20.2	9	22	14.28	1.56	57.7	23.7	19	21	37	1173	1.02778	1.33333	1.80556	26	22	20	1.1231	1.2667	1.3971	1.1231	1.2682	1.3903	0.5615	0.6333	0.6985	0.5615	0.6341	0.6951	43.0116	44.7953	46.8498	42.8453	44.6262	47.5649	14.1431	10.5263	5.8158	14.1431	10.6433	5.3312	57.1547	55.3216	52.6656	56.9884	55.3216
166	71	2	1	16.1	9	24	11.32	1.5	64	28.4	19	27	42.9	2346	0.777778	1.11111	1.30556	30	26	24	0.9471	1.096	1.1776	0.9453	1.102	1.1763	0.4735	0.548	0.5888	0.4727	0.551	0.5882	37.3342	40	41.2417	39.4304	41.2466	41.9534	23.3102	18.5253	16.8514	23.1207	19.0783	16.7406	60.6443	58.5253	58.0931	62.4763	60.553
167	77	1	1	22.9	9	26	7.55	1.46	61.6	28.9	21	23	29	2124	0.861111	1.13889	1.5	27	24	20	1.0474	1.1617	1.3931	1.0443	1.1605	1.3913	0.5237	0.5808	0.6966	0.5221	0.5803	0.6956	37.5934	40.5882	43.3378	39.8801	42.4926	44.7439	22.6457	16.9608	11.9785	22.3468	16.8627	11.8439	60.2392	57.549	55.3163	62.1076	59.3137
168	79	1	2	18.9	9	26	12.25	1.6	55.5	21.7	19	20	21.5	810	0.888889	1.25	1.5	27	22	19	1.0917	1.2903	1.3864	1.0925	1.2986	1.3929	0.5459	0.6451	0.6932	0.5463	0.6493	0.6964	39.7483	42.5188	44.8223	41.2722	42.3529	44.9231	18.9489	14.8547	10.0464	19.0229	15.5005	10.51	58.6973	57.3735	54.8686	60.3257	58.127
169	67	1	1	26.4	12	28	7.78	1.48	57.2	26.1	19	22	37.7	2613	0.861111	1.22222	1.75	29	25	19	0.9867	1.1244	1.48	0.9867	1.1232	1.4825	0.4933	0.5622	0.74	0.4933	0.5616	0.7413	40.1455	43.1522	46.2838	40.2909	43.852	45.8685	19.5636	13.0435	7.7703	19.5636	12.9348	7.9392	59.7091	56.1957	54.0541	59.8545	56.7391
170	65	1	1	18.9	16	27	5.69	1.51	74.2	32.5	22	33	44.9	396	0.944444	1.16667	1.55556	25	23	20	1.1551	1.2509	1.3942	1.1551	1.2574	1.4039	0.5775	0.6255	0.6971	0.5775	0.6287	0.7019	40.1472	42.0725	44.9093	40.3925	42.1649	44.8753	19.4603	15.544	9.9024	19.4603	16.0622	10.5997	59.6075	57.6166	54.8117	59.8528	58.4456
171	70	3	3	24.2	9	23	6.37	1.55	51.3	21.4	21	12	23.9	6972	1.22222	1.58333	1.83333	22	19	18	1.301	1.4544	1.4929	1.301	1.4521	1.5033	0.6505	0.7272	0.7464	0.6505	0.7261	0.7517	42.7975	44.6345	47.0175	43.5282	45.4829	46.5157	13.6743	9.9533	6.1404	13.6743	9.7978	6.8421	56.4718	54.5879	53.1579	57.2025	55.21
172	68	1	1	24.2	9	26	11.53	1.61	57.7	22.3	23	23	35	3066	1.25	1.55556	1.63889	19	18	18	1.4286	1.5	1.5101	1.4304	1.4956	1.5101	0.7143	0.75	0.7551	0.7152	0.7478	0.7551	41.125	43.5556	44.3411	42.1973	43.685	44.186	16.625	12.8889	11.4729	16.75	12.5926	11.4729	57.75	56.4444	55.814	59	56.1481
173	74	1	1	20	12	27	7.63	1.48	55.6	25.4	18	22	39	8958	0.916667	1.16667	1.44444	26	25	24	1.11	1.134	1.1844	1.1108	1.1317	1.1787	0.555	0.567	0.5922	0.5554	0.5658	0.5893	38.964	40.8436	42.9268	39.6849	41.0309	44.4853	21.3213	18.2099	12.8049	21.3964	18.0041	12.3171	60.2853	59.0535	55.7317	61.1111	58.9506
174	66	2	1	16.7	12	30	7.35	1.51	54.3	23.8	20	16	30.1	7224	1.02778	1.5	1.69444	24	20	19	1.1778	1.4269	1.4718	1.1727	1.4269	1.4645	0.5889	0.7134	0.7359	0.5863	0.7134	0.7322	38.7435	42.5756	44.0789	39.2638	42.3127	43.4711	22.164	15.1117	12.6645	21.7277	15.1117	12.1711	60.9075	57.6873	56.7434	60.8202	57.4244
175	74	2	1	17.9	18	28	9.66	1.55	52.7	21.9	18	18	34	6426	1	1.41667	1.61111	22	20	19	1.2867	1.3618	1.4638	1.2878	1.3618	1.4684	0.6433	0.6809	0.7319	0.6439	0.6809	0.7342	39.7237	42.1326	43.3962	40.8973	42.7828	43.5737	19.3437	15.0845	12.8931	19.4301	15.0845	13.2075	59.0674	57.2172	56.2893	60.3627	57.8674
176	67	2	1	17.7	12	25	9.98	1.41	52.7	26.5	17	21	39.6	0	0.777778	1	1.52778	29	28	21	1.0007	1.0275	1.291	1.0001	1.0267	1.2891	0.5004	0.5138	0.6455	0.5	0.5133	0.6445	39.3135	42.1736	44.9704	39.8574	41.1526	44.8889	20.8549	16.7072	10.2071	20.7902	16.6261	10.0592	60.1684	58.8808	55.1775	60.6218	57.7453
177	77	1	1	22.3	12	26	7.81	1.51	58.9	25.8	19	24	40.1	2796	0.944444	1.16667	1.47222	25	23	21	1.1551	1.1978	1.3305	1.1569	1.2004	1.3268	0.5775	0.5989	0.6653	0.5785	0.6002	0.6634	39.9019	41.342	42.3237	40.0816	40.9287	43.4119	19.9509	17.6407	14.3845	20.1145	17.8571	14.1079	59.8528	58.9827	56.7082	60.2617	58.8745
178	72	3	3	29.8	12	22	7.31	1.63	74.7	28.1	27	26	35.1	1262	0.888889	1.44444	1.63889	25	21	20	1.1582	1.3126	1.3951	1.1582	1.3163	1.3972	0.5791	0.6563	0.6976	0.5791	0.6581	0.6986	40.5219	45.1169	46.1087	41.7498	44.5816	44.868	17.7283	10.1788	8.9574	17.7283	10.4539	9.1043	58.2502	55.2957	55.0661	59.4781	55.1582
179	69	3	3	26.7	12	23	8.07	1.51	53.8	23.6	20	16	29.8	4025	0.861111	1.30556	1.55556	26	22	20	1.1014	1.2824	1.3825	1.1101	1.2809	1.4194	0.5507	0.6412	0.6913	0.555	0.6404	0.7097	39.1613	42.7602	45.2883	40.0564	43.7146	44.3836	20.4691	13.5747	9.1421	21.2509	13.4615	11.8143	59.6304	56.3348	54.4304	61.6205	57.1267
180	71	1	1	22	16	29	7.26	1.54	56.7	23.9	19	20	36	2986	1.05556	1.30556	1.5	25	24	22	1.1284	1.2024	1.2967	1.1294	1.2076	1.2967	0.5642	0.6012	0.6483	0.5647	0.6038	0.6483	43.0309	44.2997	45.2442	40.8411	41.6216	43.7018	16.0898	13.8979	11.054	16.1833	14.3322	11.054	59.1207	58.1976	56.2982	57.0627	56.1346
181	72	1	1	23.8	18	29	4.32	1.57	61.2	24.8	22	20	32	5421	0.833333	1.11111	1.41667	25	24	21	1.1533	1.1978	1.3777	1.1542	1.1989	1.3706	0.5767	0.5989	0.6889	0.5771	0.5994	0.6853	40.1012	40.9091	43.4447	39.4224	41.7053	44.3152	20.448	17.3469	12.4679	20.5202	17.4397	11.9537	60.5491	58.256	55.9126	59.9711	59.1837
182	70	1	1	20.3	16	26	6.28	1.58	57.3	23	20	19	33.8	2275	0.777778	1.05556	1.47222	27	23	20	1.0599	1.1834	1.3968	1.0571	1.1904	1.4281	0.5299	0.5917	0.6984	0.5285	0.5952	0.714	38.7592	41.1298	43.7418	37.9264	39.7044	42.5258	23.4156	18.9296	12.78	23.1488	19.5243	15.0198	62.1748	60.0595	56.5217	60.974	59.4648
183	72	1	1	21.4	16	27	8.16	1.49	54	24.3	20	17	30.5	3672	0.833333	1.22222	1.58333	26	23	20	1.1	1.2114	1.3696	1.0992	1.2114	1.3696	0.55	0.6057	0.6848	0.5496	0.6057	0.6848	39.3939	41.0314	43.2081	39.7657	41.3677	43.2081	20.8678	17.6009	13.5838	20.7989	17.6009	13.5838	60.2617	58.6323	56.7919	60.5372	58.9686
184	67	4	4	17	9	22	12.78	1.55	50.2	20.9	18	16	32.1	462	0.944444	1.13889	1.44444	22	23	20	1.3033	1.2528	1.4011	1.3054	1.2503	1.3975	0.6517	0.6264	0.7006	0.6527	0.6251	0.6988	42.19	42.9293	44.8454	42.926	43.3198	44.832	14.8148	13.8384	10.4381	14.9758	13.6364	10.1804	57.0048	56.7677	55.2835	57.971	56.8687
185	67	1	1	25.2	12	24	8.97	1.53	56.6	24.2	20	18	32.2	2376	0.972222	1.33333	1.47222	25	21	21	1.1521	1.3083	1.3232	1.1482	1.3	1.3232	0.576	0.6542	0.6616	0.5741	0.65	0.6616	40.3376	41.4013	43.2545	39.5428	41.9231	42.5591	20.2532	16.9427	14.1864	19.9156	16.3057	14.1864	60.5907	58.3439	57.4409	59.3249	57.9618
186	66	1	1	21.7	16	28	11.96	1.58	69.8	28	24	26	37.4	2712	1.05556	1.44444	1.69444	24	22	20	1.1949	1.3064	1.4085	1.2002	1.308	1.4127	0.5974	0.6532	0.7043	0.6001	0.654	0.7064	41.0777	43.1204	44.812	41.9525	43.3129	45.1274	16.7845	13.5135	9.9248	17.2261	13.6364	10.2256	57.8622	56.6339	54.7368	59.364	57.0025
187	73	4	3	17.3	9	22	10.07	1.59	69.2	27.4	22	28	40.4	1017	0.861111	1	1.47222	24	25	20	1.1668	1.143	1.4133	1.1616	1.144	1.4097	0.5834	0.5715	0.7067	0.5808	0.572	0.7048	38.7454	40.7699	43.8802	39.4366	40.5594	44.2559	21.9926	18.6352	11.9792	21.5498	18.7227	11.7188	60.738	59.4051	55.8594	60.8118	59.3176
188	69	2	1	17.7	9	27	10.75	1.55	68	28.3	21	29	42.9	1512	1.11111	1.25	1.38889	24	23	21	1.2156	1.2597	1.3142	1.22	1.2569	1.3142	0.6078	0.6299	0.6571	0.61	0.6285	0.6571	40.128	40.9041	42.14	39.7086	40.9945	41.8758	20.0183	18.1918	15.9841	20.3839	17.9713	15.9841	60.1463	59.0959	58.1242	60.2377	58.8754
189	69	1	1	24.8	16	29	8.53	1.55	72.1	30	24	29	40.3	1955	0.944444	1.19444	1.44444	25	25	22	1.1466	1.1777	1.2535	1.1494	1.1777	1.2759	0.5733	0.5889	0.6267	0.5747	0.5889	0.638	40.1153	41.0751	44.3022	39.1947	41.2779	41.8868	20.5931	17.6471	13.0602	20.8402	17.6471	14.8528	60.7084	58.7221	57.3624	60.1318	58.9249
190	66	1	1	26.2	9	28	8.81	1.57	55.1	22.4	21	17	30.6	7692	0.916667	1.22222	1.69444	25	24	20	1.1183	1.1941	1.4	1.1128	1.1929	1.4022	0.5592	0.5971	0.7	0.5564	0.5964	0.7011	39.2623	41.5558	44.4781	39.7035	41.5984	44.864	21.2295	16.8884	10.59	20.7377	16.7861	10.7413	60.4918	58.4442	55.0681	60.2459	58.3419
191	89	2	1	15	9	25	11.75	1.58	60.4	24.2	21	20	33.1	527.5	0.861111	1.16667	1.33333	27	26	23	1.0553	1.1168	1.2444	1.0545	1.1158	1.2504	0.5276	0.5584	0.6222	0.5272	0.5579	0.6252	39.6884	41.3105	42.2619	40.4603	41.0646	42.5355	19.8813	17.6638	15	19.8071	17.5689	15.4762	59.5697	58.9744	57.2619	60.2374	58.5945
192	84	4	4	11.5	9	19	31.37	1.55	54	22.5	18	19	34.7	1977	0.638889	0.777778	0.916667	41	36	30	0.7141	0.805	0.9308	0.7163	0.8069	0.9336	0.3571	0.4025	0.4654	0.3581	0.4035	0.4668	36.6799	38.5266	40.5303	36.8186	40.5422	40.1813	26.3917	20.8333	19.1667	26.6899	21.0749	19.4697	63.0716	59.3599	59.697	63.6183	61.715
193	85	4	3	11.4	9	20	10.62	1.48	54.2	24.7	19	18	33.3	6377	1.16667	1.5	1.69444	27	24	23	1.0723	1.158	1.1711	1.0733	1.17	1.1861	0.5361	0.579	0.5855	0.5367	0.585	0.5931	42.6311	45.7254	49.0354	42.0949	44.2308	47.1429	15.2324	9.5855	3.2154	15.3314	10.6218	4.5016	57.8635	55.3109	52.2508	57.4679	55.3109
194	88	4	4	13.5	9	23	12.92	1.43	45.6	22.3	15	17	36.2	1866	1.05556	1.19444	1.38889	25	25	24	1.1347	1.1574	1.2292	1.1316	1.1538	1.2292	0.5674	0.5787	0.6146	0.5658	0.5769	0.6146	42.9767	43.5501	44.9718	42.0709	44.2029	44.0678	15.0698	12.3839	10.9605	14.7907	12.0743	10.9605	58.0465	55.934	55.9322	56.7442	56.1404
195	74	4	3	15.2	16	23	10.75	1.49	44.7	20.1	15	15	34.2	693	1.02778	1.36111	1.58333	23	22	20	1.247	1.3097	1.427	1.247	1.3188	1.423	0.6235	0.6548	0.7135	0.6235	0.6594	0.7115	42.4908	45.2656	45.4924	41.9414	44.6101	45.758	15.5678	9.8152	8.8766	15.5678	10.5081	8.5992	58.0586	55.0808	54.3689	57.5092	55.4273
196	71	1	2	22.4	16	25	12.47	1.6	48.8	19.1	20	11	21.8	5388	1.25	1.52778	1.75	21	20	19	1.3219	1.3616	1.465	1.3203	1.3578	1.4625	0.6609	0.6808	0.7325	0.6602	0.6789	0.7313	44.3262	46.8443	48.1229	44.6154	47.398	47.3504	11.1111	5.8906	4.6075	10.9929	5.6101	4.4369	55.4374	52.7349	52.7304	55.5556	52.8752
197	81	1	2	19.7	16	27	12.35	1.56	52.2	21.4	18	17	33	1484	0.916667	1.27778	1.47222	26	22	20	1.1375	1.3062	1.4041	1.1408	1.3019	1.4005	0.5688	0.6531	0.7021	0.5704	0.651	0.7002	39.0476	41.7391	42.8571	40.4675	42.4209	43.7582	20.3663	15.9783	13.4993	20.6593	15.6522	13.2372	59.4139	57.7174	56.3565	61.2454	57.9348
198	80	3	3	20.3	9	17	11.19	1.47	52.1	24.1	18	18	35	933	1.05556	1.22222	1.38889	25	23	23	1.1358	1.2317	1.2068	1.1337	1.2344	1.2145	0.5679	0.6159	0.6034	0.5668	0.6172	0.6073	43.6803	44.5424	45.2685	42.6443	44.3344	44.9809	13.7546	11.0254	9.4629	13.5688	11.2459	10.1023	57.4349	55.5678	54.7315	56.1338	55.6781
[truncated: 61 more columns]
